# Supplementary material for: Superior perrhenate anion recognition in water by a halogen bonding acyclic receptor
Source: Royal Society of Chemistry journal article supplement (doi:10.1039/c4cc10130h), 2015-01-01
Supplement: c4cc10130h1.pdf [file c4cc10130h1.pdf]

## Electronic Supplementary Information for

### **Superior perrhenate anion recognition in water by a halogen bonding acyclic receptor**

Jason Y.C. Lim<sup>a</sup> and Paul D. Beer<sup>\*a</sup>

<sup>a</sup>Chemistry Research Laboratory, Department of Chemistry, University of Oxford,  
Mansfield Road, Oxford, OX1 3TA, UK.

E-mail: paul.beer@chem.ox.ac.uk

---

#### **Contents**

|                                                                     |     |
|---------------------------------------------------------------------|-----|
| 1. Synthesis and Characterisation-----                              | S2  |
| 2. Anion Recognition Studies by <sup>1</sup> H NMR Titrations ----- | S11 |
| 3. Luminescence Titrations -----                                    | S15 |
| 4. References -----                                                 | S15 |

## S1. Synthesis and Characterisation

### S1.1 General Procedure

All commercially available chemicals and solvents were used as received without further purification. All dry solvents were thoroughly degassed with N<sub>2</sub>, dried through a Mbraun MPSP-800 column and used immediately. Water used was deionized and passed through a Milli-Q<sup>®</sup> Millipore machine for microfiltration. TBTA (tris(benzyltriazolemethyl)amine) was prepared according to reported procedures.<sup>1</sup> Amberlite<sup>®</sup> was prepared by washing the commercial resin beads sequentially with 10 % NaOH (aq), water, 0.1 M NH<sub>4</sub>PF<sub>6</sub> (aq), further water, and finally loaded with 0.1 M NH<sub>4</sub>NO<sub>3</sub> (aq) before any anion exchange to the nitrate salt occurred.

NMR spectra were recorded on Bruker AVIII HD Nanobay 400 MHz, Bruker AVIII 500 MHz and Bruker AVIII 500 MHz (with <sup>13</sup>C cryoprobe) spectrometers. Electrospray ionisation mass spectrometry (ESI-MS) was performed using the Waters Micromass LCT and Bruker microTOF spectrometers.

### S1.2 Synthesis of Compounds

(2,5,8,11-tetraoxatridecan-13-yl) *p*-toluenesulfonate (TsO-TEG-OMe) was synthesized from tetraethylene glycol<sup>2</sup> and 5-bromo-1,2,3-trihydroxybenzene was obtained from 5-bromo-1,2,3-trimethoxybenzene<sup>3</sup> by following literature protocols.

#### 5-bromo-1,2,3-tris(tetraethylene glycol methyl ether)benzene

Procedure modified from a literature protocol.<sup>4</sup>

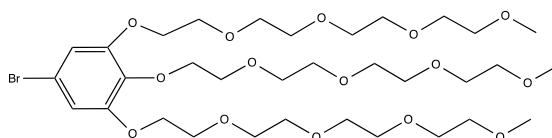

5-bromo-1,2,3-trihydroxybenzene (609 mg, 2.97 mmol) was mixed with anhydrous potassium carbonate (2.05 g, 14.9 mmol) and degassed and filled with N<sub>2</sub> thrice. Acetonitrile (20 mL) was degassed by bubbling with N<sub>2</sub> for 30 minutes before TsO-TEG-OMe (3.34 g, 9.22 mmol) was dissolved in it and added to the solid mixture. The reaction was stirred for 3 days under N<sub>2</sub> at 70 °C. After which, the reaction was cooled to ambient temperature and solvent removed *in vacuo* before chloroform (10 mL) and water (20 mL) was added. The aqueous layer was extracted with chloroform (5 x 20 mL) and the combined organics were dried with MgSO<sub>4</sub>. Removal of solvent gave a brown liquid which was purified by silica gel chromatography (4 % CH<sub>3</sub>OH in CH<sub>2</sub>Cl<sub>2</sub>) to give the product as a yellow liquid (1.91 g, 83 %). <sup>1</sup>H-NMR (400 MHz, CDCl<sub>3</sub>) δ 6.74 (s, 2H, ArH), 4.13 (t, 6H, <sup>3</sup>J = 5.0 Hz, Ar-OCH<sub>2</sub>), 3.54-3.84 (m, 42H, TEG alkyl groups), 3.38 (s, 9H, OCH<sub>3</sub>); <sup>13</sup>C-NMR (100 MHz, *d*<sub>6</sub>-DMSO) δ 153.3, 137.9, 115.7, 111.5, 72.3, 71.9, 70.9, 70.7, 70.6, 70.6 (repeat), 70.5, 70.4, 69.6, 69.1, 59.0; MS (ESI) *m/z* calc. for [M + H]<sup>+</sup> = 775.3, found 775.2.

#### 5-amino-1,2,3-tris(tetraethylene glycol methyl ether)benzene

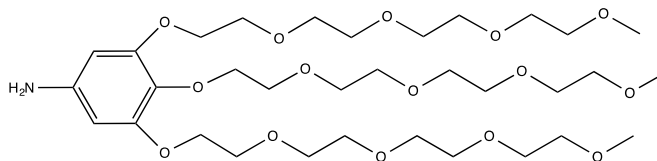

5-bromo-1,2,3-tris(tetraethylene glycol methyl ether)benzene (245 mg, 0.319 mmol) was dissolved in 28 % aqueous ammonia (6.0 mL) before ethylene glycol (0.18 mL, 3.19 mmol) and copper(I) iodide (61.0 mg, 0.319 mmol) were added portionwise. The mixture was stirred to mix before being heated in a microwave reactor at 150 °C for 1 hour. Upon cooling to ambient temperature, the brown aqueous mixture was diluted with water (10 mL) before extraction by chloroform (5 x 15 mL) till the organic layer was no longer coloured. The combined organics were dried with MgSO<sub>4</sub> and dried *in vacuo* to give the product as a brown liquid in good purity (221 mg, 98 %). The product was used without further purification. **<sup>1</sup>H-NMR** (400 MHz, CDCl<sub>3</sub>) δ 5.97 (s, 2H, ArH), 4.11 (t, 4H, <sup>3</sup>J = 5.2 Hz, *meta*-ArOCH<sub>2</sub>-), 4.04 (t, 4H, <sup>3</sup>J = 5.2 Hz, *para*-ArOCH<sub>2</sub>-), 3.82 (t, 4H, <sup>3</sup>J = 5.2 Hz, *meta*-ArOCH<sub>2</sub>CH<sub>2</sub>-), 3.76 (t, 4H, <sup>3</sup>J = 5.2 Hz, *para*-ArOCH<sub>2</sub>CH<sub>2</sub>-), 3.55-3.71 (m, 36H, dendrimer alkyl-CH<sub>2</sub>), 3.38 (s, 9H, OCH<sub>3</sub>); **<sup>13</sup>C-NMR** (100 MHz, CDCl<sub>3</sub>) δ 153.2, 142.9, 131.1, 95.6, 72.5, 72.4, 71.9, 70.8, 70.6, 70.5, 70.4, 70.3, 69.7, 68.7, 61.7, 59.0; **MS** (ESI +ve) *m/z* 712.4096 ([M + H]<sup>+</sup>, C<sub>33</sub>H<sub>62</sub>NO<sub>15</sub>, calc. 712.4114).

#### 5-azido-1,2,3-tris(tetraethylene glycol methyl ether)benzene

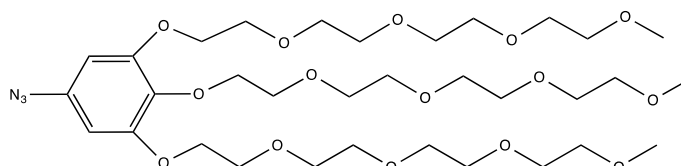

5-amino-1,2,3-tris(tetraethylene glycol methyl ether)benzene (500 mg, 0.702 mmol) was dissolved in 25 % sulfuric acid (10 mL) and chilled to 0 °C in an ice bath. A saturated solution of sodium nitrite (97.0 mg, 1.40 mmol) was then added and the reaction stirred at 0 °C for 1 hour. An aqueous solution of sodium azide (228 mg, 3.51 mmol) was then added carefully dropwise and the reaction was warmed up to ambient temperature and stirred for 4 hours. The dark red aqueous solution was then extracted with chloroform till the organic phase was no longer coloured. After drying with MgSO<sub>4</sub>, removal of solvent gave the product as a red-brown liquid in sufficient purity without requiring further purification (492 mg, 95 %). **<sup>1</sup>H-NMR** (400 MHz, CDCl<sub>3</sub>) δ 6.26 (s, 2H, ArH), 4.12 (t, 4H, <sup>3</sup>J = 4.8 Hz, *meta*-ArOCH<sub>2</sub>-), 4.08 (t, 4H, <sup>3</sup>J = 5.1 Hz, *para*-ArOCH<sub>2</sub>-), 3.82 (t, 4H, <sup>3</sup>J = 5.0 Hz, *meta*-ArOCH<sub>2</sub>CH<sub>2</sub>-), 3.76 (t, 4H, <sup>3</sup>J = 5.2 Hz, *para*-ArOCH<sub>2</sub>CH<sub>2</sub>-), 3.51-3.71 (m, 36H, dendrimer alkyl-CH<sub>2</sub>), 3.36 (s, 9H, OCH<sub>3</sub>); **<sup>13</sup>C-NMR** (100 MHz, CDCl<sub>3</sub>) δ 153.5, 135.8, 135.4, 99.0, 72.6, 72.4, 71.9, 70.8, 70.6, 70.5, 70.3, 69.6, 69.0, 61.7, 59.0; **MS** (ESI +ve) *m/z* 760.3809 ([M + Na]<sup>+</sup>, C<sub>33</sub>H<sub>59</sub>N<sub>3</sub>O<sub>15</sub>Na, calc. 760.3838).

### 1,3-bis(iodoethynyl)benzene

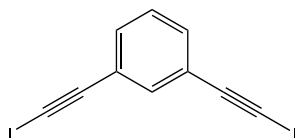

1,3-diethynylbenzene (0.05 mL, 0.376 mmol) was dissolved in dry THF (1 mL) and the resulting yellow solution was cooled to -78 °C. 1.6 M *n*-butyllithium (0.72 mL, 1.13 mmol) was then added dropwise to the reaction which was stirred at -78 °C for 30 minutes before a solution of I<sub>2</sub> (0.286 g, 1.13 mmol) in dry THF (2 mL) was added. After stirring for 15 minutes at -78 °C, the reaction was warmed up slowly to ambient temperature and stirred for a further 1 hour. A saturated solution of sodium thiosulfate (5 mL), followed by chloroform (10 mL), was then added to the brown solution and the organic layer was separated. The aqueous layer was washed with chloroform (2 x 5 mL), and the combined organics were dried with brine and MgSO<sub>4</sub>. Purification by recrystallisation with hexane gave the product as pale yellow needles (102 mg, 72 %). **<sup>1</sup>H-NMR** (400 MHz, CDCl<sub>3</sub>) δ 7.51 (s, 1H, *ArH*), 7.37 (d, 2H, <sup>3</sup>*J* = 1.6 Hz, *ArH*), 7.25-7.28 (m, 1H, *ArH*); **<sup>13</sup>C-NMR** (100 MHz, CDCl<sub>3</sub>) δ 136.1, 132.5, 128.3, 123.7, 93.1, 7.6; **MS (EI)** *m/z* calc. for [M]<sup>+</sup> = 377.84, found 377.84.

### 1,3-bis(prototriazole)benzene receptor precursor

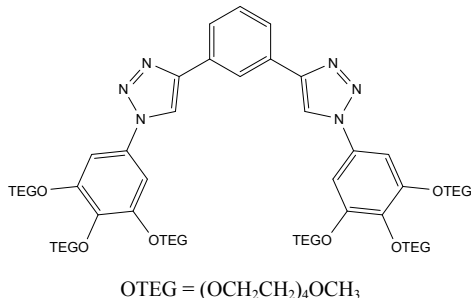

1,3-diethynylbenzene (4.5 μL, 0.034 mmol) and 5-azido-1,2,3-tris(tetraethylene glycol methyl ether)benzene (50 mg, 0.068 mmol) were dissolved in dry, degassed CH<sub>2</sub>Cl<sub>2</sub> (2 mL). To this mixture was added diisopropylethylamine (23 μL, 0.136 mmol), TBTA (9 mg, 0.017 mmol) and Cu(MeCN)<sub>4</sub>PF<sub>6</sub> (6.3 mg, 0.017 mmol) and the reaction was stirred for 3 days at room temperature in a N<sub>2</sub> atmosphere. Subsequently, the reaction was washed with 10 % aqueous ammonia (2 x 5 mL), and the aqueous layer was back-extracted with chloroform (3 x 5 mL). The combined organics were dried with brine and MgSO<sub>4</sub> before the solvent was removed to yield a brown oil. Silica gel chromatography (6 % CH<sub>3</sub>OH in CH<sub>2</sub>Cl<sub>2</sub> as eluent) gave the product as a sticky yellow liquid (41 mg, 76 %). **<sup>1</sup>H-NMR** (400 MHz, CDCl<sub>3</sub>) δ 8.46 (s, 1H, spacer *ArH*), 8.37 (s, 2H, triazole-*H*), 7.93 (d, 2H, <sup>3</sup>*J* = 7.6 Hz, spacer *ArH*), 7.55 (t, 1H, <sup>3</sup>*J* = 7.6 Hz, spacer *ArH*), 7.10 (s, 4H, dendrimer *ArH*), 4.26 (t, 8H, <sup>3</sup>*J* = 4.8 Hz, *meta*-ArOCH<sub>2</sub>-), 4.20 (t, 4H, <sup>3</sup>*J* = 4.8 Hz, *para*-ArOCH<sub>2</sub>-), 3.86 (t, 8H, <sup>3</sup>*J* = 4.8 Hz, *meta*-ArOCH<sub>2</sub>CH<sub>2</sub>-), 3.79 (t, 4H, <sup>3</sup>*J* = 4.8 Hz, *para*-ArOCH<sub>2</sub>CH<sub>2</sub>-), 3.51-3.72 (m, 72H, dendrimer alkyl-CH<sub>2</sub>), 3.36 (s, 6H, *para*-dendrimer terminal OCH<sub>3</sub>), 3.33 (s, 12H, *meta*-dendrimer terminal OCH<sub>3</sub>); **<sup>13</sup>C-NMR** (100 MHz,

CDCl<sub>3</sub>)  $\delta$  153.3, 147.8, 138.7, 132.5, 130.9, 129.5, 125.6, 123.0, 118.3, 100.7, 72.5, 71.8, 70.6, 70.5, 70.4, 70.3, 69.6, 69.3, 61.7, 58.9; **MS** (ESI +ve)  $m/z$  1601.8441 ([M + H]<sup>+</sup>, C<sub>76</sub>H<sub>125</sub>N<sub>6</sub>O<sub>30</sub>, calc. 1601.8435).

#### 1,3-bis(iodotriazole)benzene receptor precursor

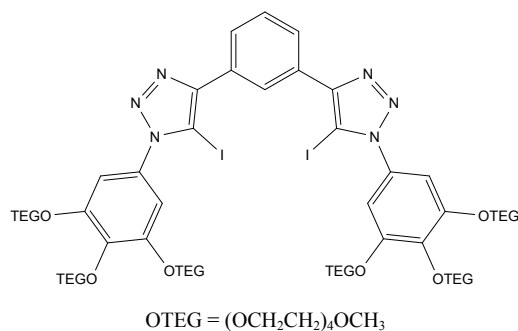

1,3-bis(iodoethynyl)benzene (25.6 mg, 0.068 mmol) and dendrimer aryl azide (100 mg, 0.136 mmol) was dissolved in degassed THF (2 mL). TBTA (7.2 mg, 0.014 mmol) and Cu(MeCN)<sub>4</sub>PF<sub>6</sub> (10 mg, 0.027 mmol) was then added portionwise and the reaction stirred under N<sub>2</sub> for 2 days. Following which, the solvent was removed *in vacuo* and chloroform (10 mL) was added. After washing with 10 % aqueous ammonia (2 x 5 mL) and water (5 mL), the organic layer was dried with brine and MgSO<sub>4</sub>. Purification by silica gel chromatography (5 % CH<sub>3</sub>OH in CH<sub>2</sub>Cl<sub>2</sub>) gave the product as a bright yellow viscous liquid (112 mg, 89 %). **<sup>1</sup>H-NMR** (400 MHz, CDCl<sub>3</sub>)  $\delta$  8.68 (s, 1H, spacer-ArH), 8.10 (d, 2H, <sup>3</sup>J = 7.6 Hz, spacer ArH), 7.65 (t, 1H, <sup>3</sup>J = 7.6 Hz, spacer ArH), 6.81 (s, 4H, dendrimer-ArH), 4.21-4.27 (m, 12H, dendrimer-OCH<sub>2</sub>), 3.84-3.90 (m, 12H, dendrimer-OCH<sub>2</sub>CH<sub>2</sub>), 3.54-3.75 (m, 72H, dendrimer alkyl-CH<sub>2</sub>), 3.38 (s, 6H, *para*-dendrimer terminal OCH<sub>3</sub>), 3.37 (s, 12H, *meta*-dendrimer terminal OCH<sub>3</sub>), **<sup>13</sup>C-NMR** (100 MHz, CDCl<sub>3</sub>)  $\delta$  152.8, 149.8, 139.8, 132.0, 130.5, 129.0, 128.0, 126.6, 106.5, 78.6, 72.6, 72.5, 71.9, 70.8, 70.6, 70.5, 70.4, 70.2, 69.6, 69.5, 69.3, 69.2, 61.7, 59.0; **MS** (ESI +ve)  $m/z$  1853.6406 ([M + H]<sup>+</sup>, C<sub>76</sub>H<sub>123</sub>N<sub>6</sub>O<sub>30</sub>I<sub>2</sub>, calc. 1853.6368).

#### 1,3-bis(prototriazole)benzene dendrimer receptor.2NO<sub>3</sub><sup>-</sup> salt (**1a**)

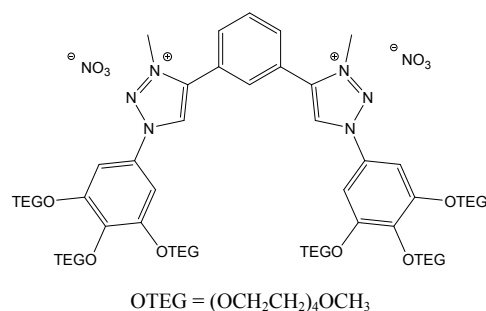

1,3-bis(prototriazole)benzene receptor precursor (40 mg, 0.025 mmol) was dissolved in dry CH<sub>2</sub>Cl<sub>2</sub> (1 mL) and added to trimethyloxonium tetrafluoroborate (8.1 mg, 0.055 mmol). The reaction was stirred under N<sub>2</sub> for 2 days, before MeOH (2 mL) was added to quench the reaction. The solvent was removed

*in vacuo* before preparatory thin layer chromatography (7.5 % CH<sub>3</sub>OH in CH<sub>2</sub>Cl<sub>2</sub>) afforded the purified product as a sticky pale yellow liquid. Anion exchange was then carried out by dissolving the purified product in 9:1 CH<sub>3</sub>OH/ H<sub>2</sub>O and passing it through a nitrate-loaded Amberlite® anion exchange column twice. The solvent was removed *in vacuo* to afford the bis-nitrate salt of the compound as a sticky yellow liquid (28 mg, 64 %). **<sup>1</sup>H-NMR** (400 MHz, *d*<sub>4</sub>-CD<sub>3</sub>OD) δ 9.64 (s, 2H, triazolium-ArH), 8.25 (s, 1H, spacer-ArH), 8.16 (d, 2H, <sup>3</sup>*J* = 6.0 Hz, spacer ArH), 8.02 (t, 1H, <sup>3</sup>*J* = 6.0 Hz, spacer ArH), 7.40 (s, 4H, dendrimer-ArH), 4.54 (s, 6H, triazolium-NCH<sub>3</sub>), 4.24-4.30 (m, 12H, dendrimer-OCH<sub>2</sub>), 3.80-3.91 (m, 12H, dendrimer-OCH<sub>2</sub>CH<sub>2</sub>), 3.48-3.75 (m, 72H, dendrimer alkyl-CH<sub>2</sub>), 3.32 (s, 6H, *para*-dendrimer terminal OCH<sub>3</sub>), 3.30 (s, 12H, *meta*-dendrimer terminal OCH<sub>3</sub>); **<sup>13</sup>C-NMR** (100 MHz, *d*<sub>4</sub>-CD<sub>3</sub>OD) δ 153.6, 142.5, 140.4, 132.4, 130.8, 130.4, 127.5, 124.1, 100.7, 72.5, 71.5, 70.3, 70.2, 70.1, 69.9, 69.3, 57.7, 54.5, 42.4, 38.6; **MS** (ESI +ve) *m/z* 815.4419 ([M]<sup>2+</sup>, C<sub>78</sub>H<sub>130</sub>N<sub>6</sub>O<sub>30</sub>, calc. 815.4410).

### 1,3-bis(iodotriazolium)benzene receptor.2NO<sub>3</sub><sup>-</sup> salt (**1b**)

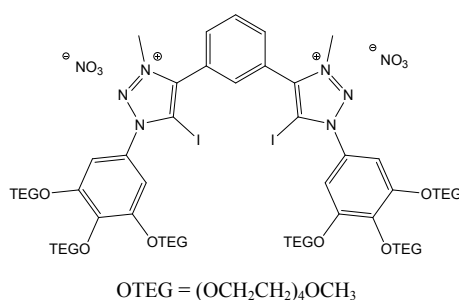

1,3-bis(iodotriazole)benzene receptor precursor (50 mg, 0.027 mmol) was dissolved in dry CH<sub>2</sub>Cl<sub>2</sub> (2 mL) and added to trimethyloxonium tetrafluoroborate (10 mg, 0.068 mmol), and the reaction was left to stir in the dark for 3 days under N<sub>2</sub>. Following which, CH<sub>3</sub>OH (1 mL) was added and stirred for 30 minutes before the solvent was removed *in vacuo*. Following purification by alumina column chromatography (CH<sub>2</sub>Cl<sub>2</sub>, gradually increasing methanol content to 3 %), anion exchange was then carried out by dissolving the purified product in 9:1 CH<sub>3</sub>OH/ H<sub>2</sub>O and passing it through a nitrate-loaded Amberlite® anion exchange column twice. Removal of solvent furnished the product as a sticky white solid (43 mg, 79 %). **<sup>1</sup>H-NMR** (400 MHz, *d*<sub>4</sub>-CD<sub>3</sub>OD) δ 8.17 (s, 1H, spacer-ArH), 8.08 (m, 3H, spacer ArH), 7.17 ((s, 4H, dendrimer-ArH), 4.43 (s, 6H, triazolium-NCH<sub>3</sub>), 4.23-4.30 (m, 12H, dendrimer-OCH<sub>2</sub>), 3.78-3.89 (m, 12H, dendrimer-OCH<sub>2</sub>CH<sub>2</sub>), 3.48-3.71 ((m, 72H, dendrimer alkyl-CH<sub>2</sub>), 3.32 (s, 6H, *para*-dendrimer terminal OCH<sub>3</sub>), 3.30 (s, 12H, *meta*-dendrimer terminal OCH<sub>3</sub>); **<sup>13</sup>C-NMR** (100 MHz, *d*<sub>4</sub>-CD<sub>3</sub>OD) δ 153.2, 145.6, 141.1, 133.7, 132.4, 131.0, 130.4, 124.7, 105.8, 93.8, 72.5, 71.6, 71.5, 70.5, 70.4, 70.3, 70.2, 69.9, 69.3, 69.2, 57.7, 38.8; **MS** (ESI +ve) *m/z* 941.3355 ([M]<sup>2+</sup>, C<sub>78</sub>H<sub>128</sub>N<sub>6</sub>O<sub>30</sub>I<sub>2</sub>, calc. 941.3377).

### S1.3 Spectral Characterisation

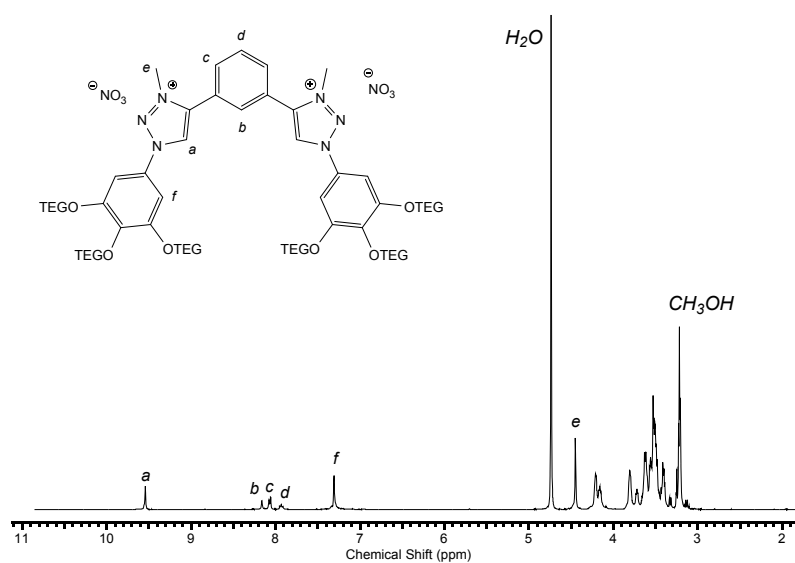

**Fig S1-1.** <sup>1</sup>H NMR of HB receptor **1a** in *d*<sub>4</sub>-CD<sub>3</sub>OD at 298 K (400 MHz). Triazolium H<sub>a</sub> is acidic and was found to undergo deuterium exchange in CD<sub>3</sub>OD.

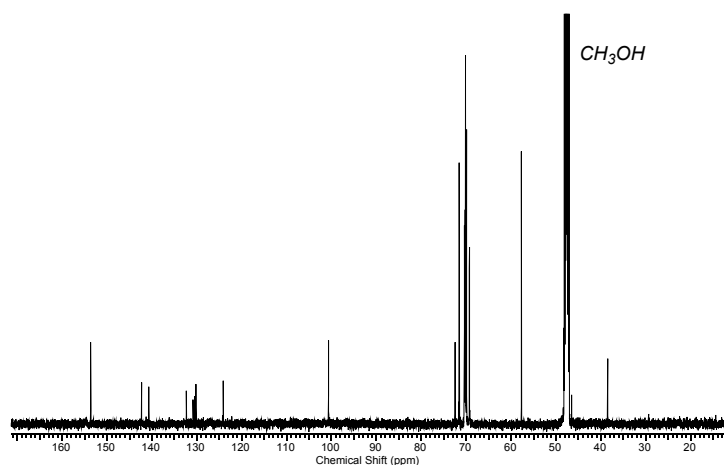

**Fig. S1-2.** <sup>13</sup>C NMR of HB receptor **1a** in *d*<sub>4</sub>-CD<sub>3</sub>OD at 298 K (100 MHz).

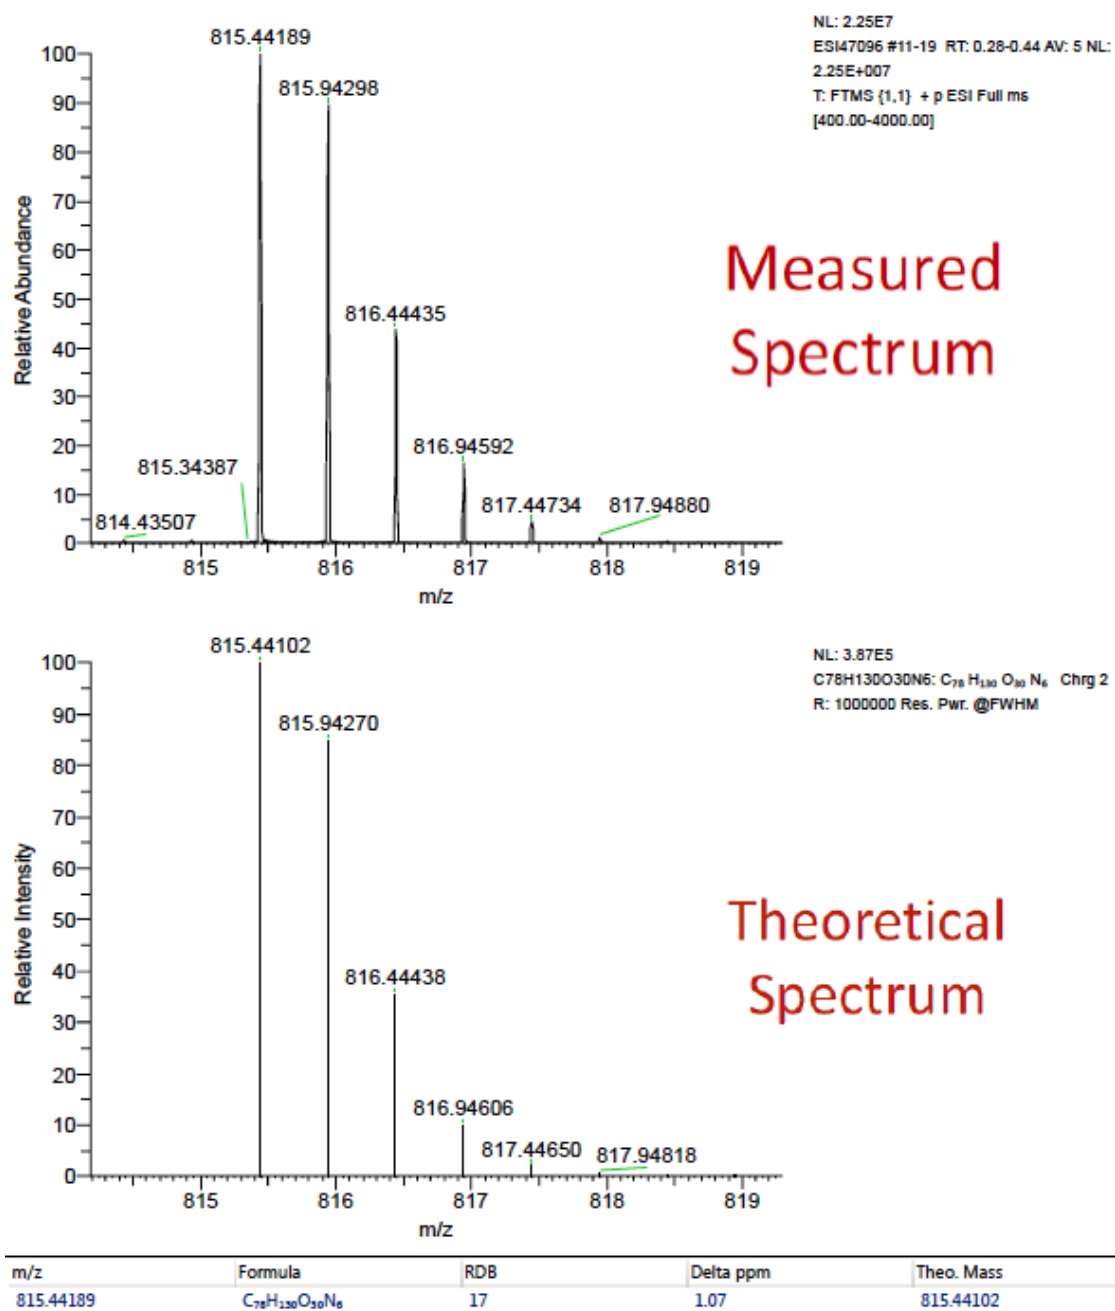

**Fig. S1-3.** High-resolution mass spectrum of HB receptor **1a**.

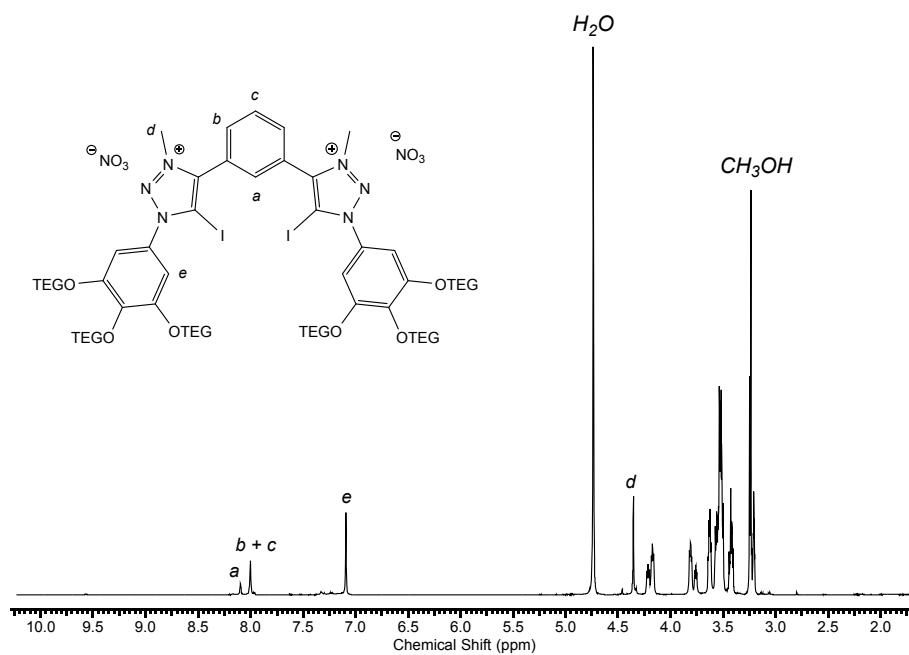

**Fig S1-4.**  $^1\text{H}$  NMR of HB receptor **1a** in  $d_4$ - $\text{CD}_3\text{OD}$  at 298 K (400 MHz)

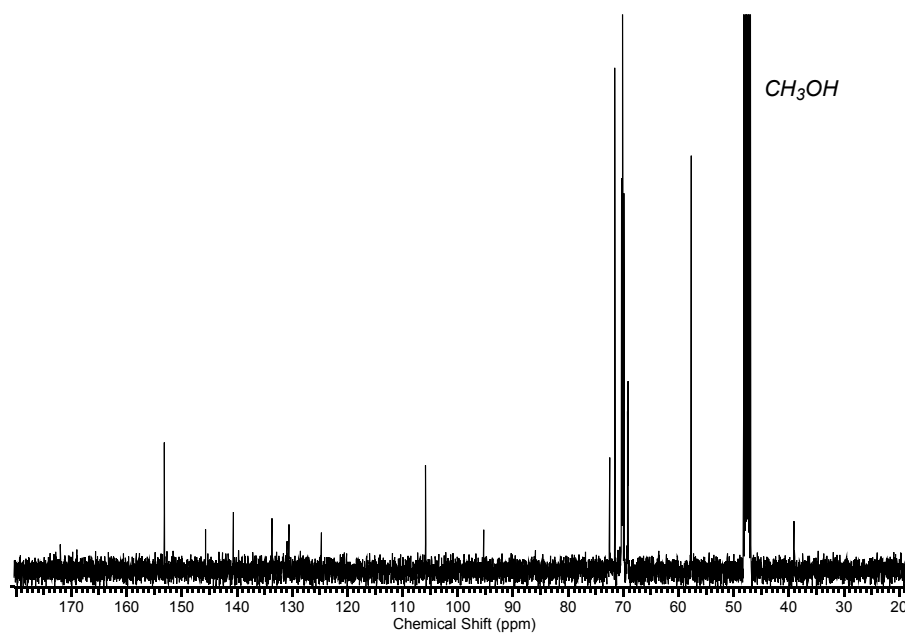

**Fig. S1-5.**  $^{13}\text{C}$  NMR of HB receptor **1a** in  $d_4$ - $\text{CD}_3\text{OD}$  at 298 K (100 MHz).

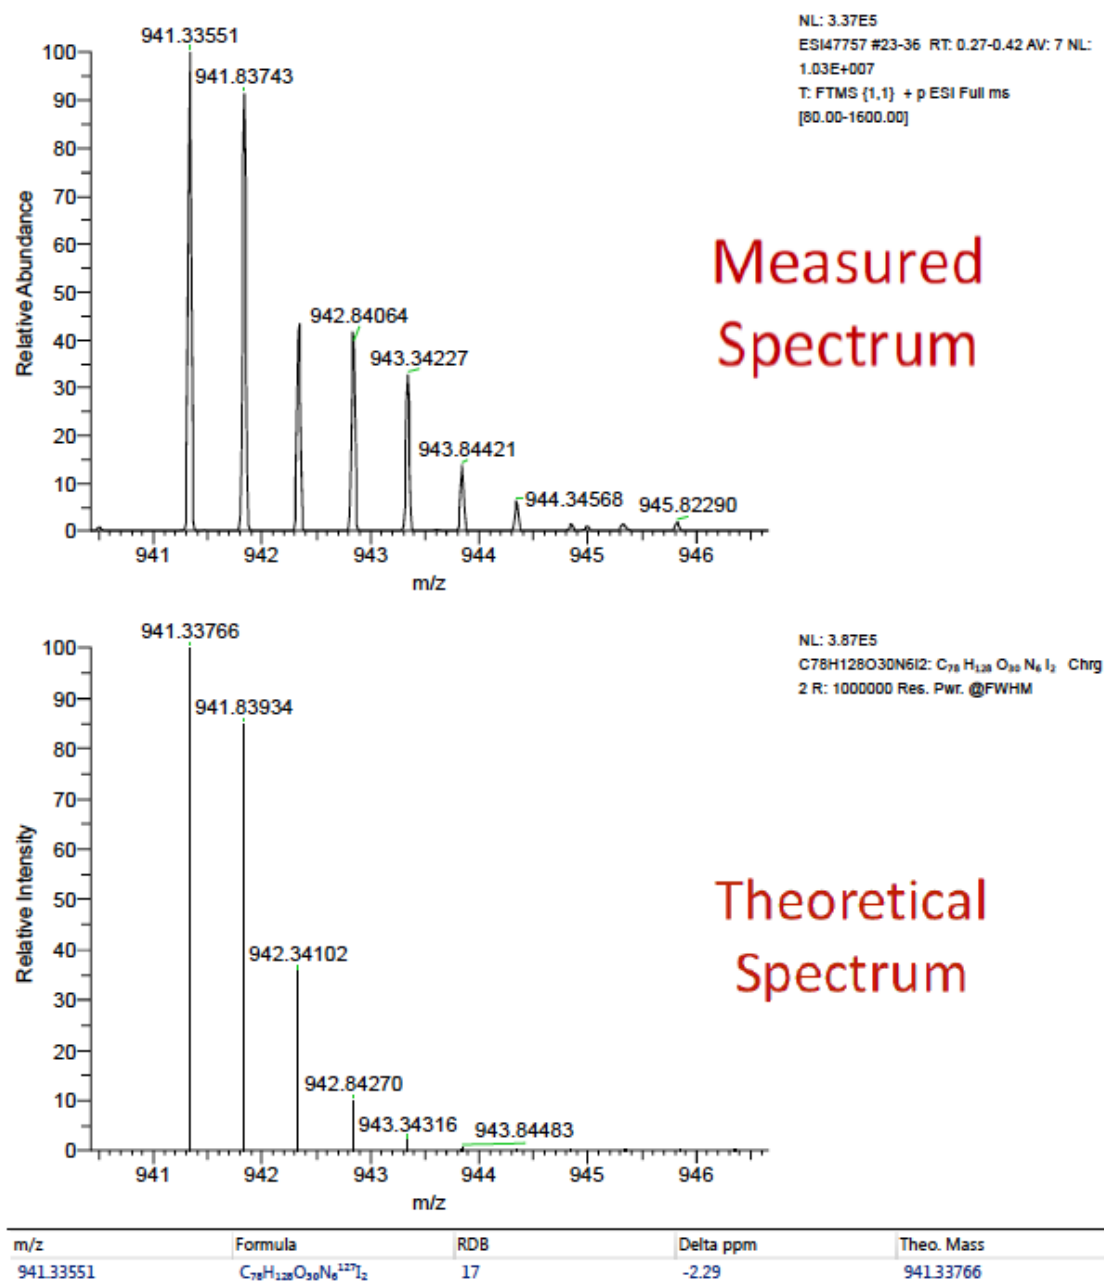

**Fig. S1-6.** High-resolution mass spectrum of HB receptor **1a**. **Top:** theoretical isotope model; **Bottom:** measured spectrum.

## S2. Anion Recognition Studies of Receptors **1a** and **1b** by $^1\text{H}$ NMR titrations

### S2.1 General Protocol

$^1\text{H}$  NMR titration experiments were performed on a Bruker AVIII 500 MHz spectrometer. In a typical experiment, a solution of the appropriate sodium salt was added to a solution of the receptor molecule at 298 K. Both sodium salt and receptor were dissolved in pure  $\text{D}_2\text{O}$  unless otherwise stated. Sodium was chosen as the counter-cation due to its strongly hydrated and non-coordinating nature. A 0.75 M solution of the salt was added to 0.50 mL of a 1.5 mM solution of receptor, where 1.0 equivalent of salt added corresponds to 1.0  $\mu\text{L}$  of the salt solution. The chemical shift of the tris-TEG aromatic *ortho*-proton was monitored for receptors **1a** and **1b** to ensure consistency. 17 data points corresponding to 0.0, 1.0, 2.0, 3.0, 5.0, 7.0, 10.0, 15.0, 20.0, 25.0, 30.0, 40.0, 50.0, 60.0, 80.0, 100.0 and 120.0 equivalents of added guest anion were obtained.

The binding of anions with receptors **1a** and **1b** were found to be fast on the NMR timescale. The values of the observed chemical shift and concentration of anion were entered into the WinEQNMR2<sup>7</sup> computer programme for every titration point. From initial estimates made of the binding constants and limiting chemical shifts, these parameters were refined using non-linear least-squares analyses to obtain the best fit between empirical and calculated chemical shifts based on a 1:1 binding stoichiometry. The input parameters were varied till convergence of the best fit values of the binding constants and their errors were obtained. Despite the dicationic nature of the receptors, a 1:1 binding stoichiometry was found with the anions (all investigated are singly charged except for sulfate).

## S2.2 $^1\text{H}$ NMR titration data for Receptors **1a** and **1b**

All titrations were carried out in  $\text{D}_2\text{O}$  at 298 K unless otherwise stated. In Figures S2-1, S2-2 and S2-4, empirical data points are represented by the filled dots, while continuous lines represent the calculated binding curves.

### Hydrogen-bonding Receptor **1a**

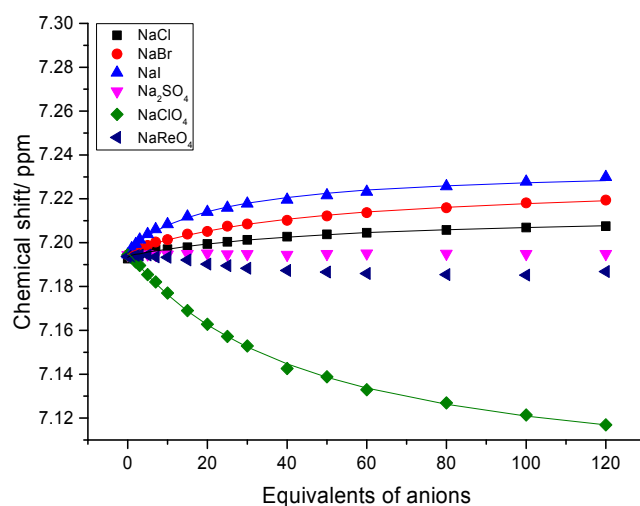

**Figure S2-1.** Plot of chemical shift of tris-TEG aromatic *ortho*-proton of hydrogen-bonding receptor **1a** against equivalents of anions added in  $\text{D}_2\text{O}$  (500 MHz,  $T = 298$  K). The triazolium protons were not followed as they are highly acidic and found to undergo quick deuterium exchange with  $\text{D}_2\text{O}$  during the NMR titration experiment.

### Halogen-bonding Receptor **1b**

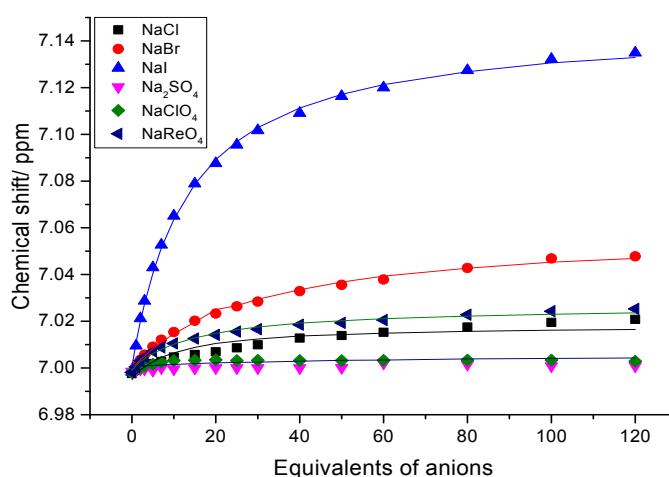

**Figure S2-2.** Plot of chemical shift of tris-TEG aromatic *ortho*-proton of hydrogen-bonding receptor **1b** against equivalents of anions added in  $\text{D}_2\text{O}$  ( $[\text{host}] = 1.5$  mM, 500 MHz,  $T = 298$  K). Although  $\text{ReO}_4^-$  showed an overall smaller perturbation of the proton signal than  $\text{I}^-$  and  $\text{Br}^-$ , saturation (and hence

plateauing) of the  $\text{ReO}_4^-$  binding isotherm was observed in the presence of c.a. 80 equivalents of anion, while flattening of the binding curve did not occur for  $\text{Br}^-$  and  $\text{I}^-$  even at 120 equivalents.

### S2.3 Control $^1\text{H}$ NMR Titration of Receptor **1a** with $\text{NaNO}_3$

To confirm that the nitrate anion is non-coordinating, anion exchange of receptor **1a** to the hexafluorophosphate ( $\text{PF}_6^-$ ) salt was performed using an Amberlite® column pre-loaded with ammonium hexafluorophosphate. A solution of **1a**· $2\text{PF}_6$  in  $\text{D}_2\text{O}$  (1.5 mM) was prepared, and a  $^1\text{H}$  NMR titration was performed with  $\text{NaNO}_3$  using an identical protocol as described above.

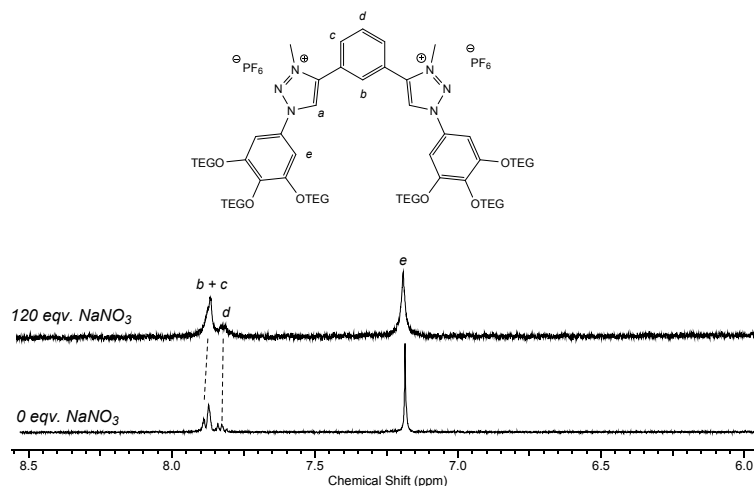

**Figure S2-3.** Partial NMR spectrum of the titration of **1a**· $2\text{PF}_6$  with  $\text{NaNO}_3$  in  $\text{D}_2\text{O}$  ([host] = 1.5 mM, 500 MHz,  $T = 298$  K). No significant perturbation of the  $H_e$  signal was observed even after 120 equivalents of  $\text{NaNO}_3$ .

### S2.4 $^1\text{H}$ NMR Titration of Receptor **1b** with $\text{NaReO}_4$ in 10 mM HEPES solution (pD = 7.4)

To investigate whether the presence of a dissolved buffer will influence the binding properties of receptor **1b** with  $\text{NaReO}_4$  in  $\text{D}_2\text{O}$ , an analogous  $^1\text{H}$  NMR titration experiment was performed. Analysis of the data with the WinEQNMR2 software (1:1 binding) gave an association constant of  $45 \pm 4 \text{ M}^{-1}$ , which is consistent with that obtained in pure  $\text{D}_2\text{O}$  (Table 1, main paper).

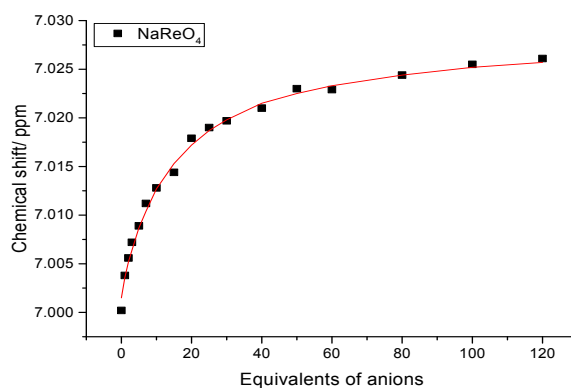

**Figure S2-4.** Plot of chemical shift of tris-TEG aromatic *ortho*-proton of hydrogen-bonding receptor **1b** against equivalents of  $\text{NaReO}_4$  added in 10 mM HEPES solution in  $\text{D}_2\text{O}$  (pD = 7.4, [host] = 1.5 mM, 500 MHz,  $T = 298$  K).

## S2.5 VT NMR studies

### VT NMR studies of Receptor **1b** with NaReO<sub>4</sub>

<sup>1</sup>H NMR titrations of **1b** with NaReO<sub>4</sub> in D<sub>2</sub>O were performed at four different temperatures (T = 298, 308, 318 and 338 K).

**Table S1.** Association constants  $K_a$  (M<sup>-1</sup>) of Receptor **1b** with NaReO<sub>4</sub> at different temperatures.

| $T / K$ | $K_a$ (M <sup>-1</sup> ) |
|---------|--------------------------|
| 298     | 44(2)                    |
| 308     | 38(3)                    |
| 318     | 34(3)                    |
| 338     | 24(2)                    |

<sup>a</sup> 1:1 association constants were calculated from <sup>1</sup>H NMR titrations in D<sub>2</sub>O using the WinEQNMR2 software.<sup>7</sup> Errors < 10 % ([host] = 1.5 mM).

A van't Hoff analysis was performed by plotting  $R\ln K_a$  against  $1/T$ . The values of  $\Delta H$  and  $\Delta S$  were obtained from the gradient and the ordinate intercept of the best-fit line according to the following equation:

$$R\ln K_a = - \frac{\Delta H}{T} + \Delta S$$

### VT NMR studies of Receptor **1a** with NaReO<sub>4</sub>

A VT NMR titration was performed with receptor **1a** at 318 K in pure D<sub>2</sub>O. As seen from **Figure S2-5** below, no binding was observed at 120.0 equivalents of NaReO<sub>4</sub>.

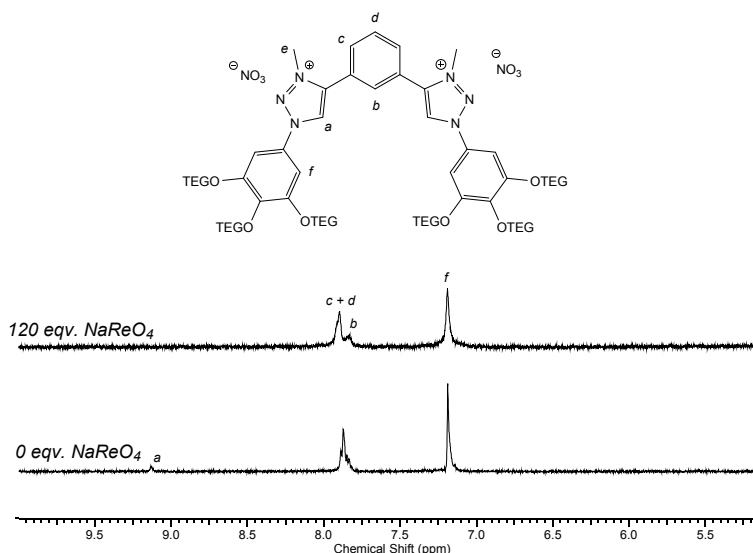

**Figure S2-5.** Partial NMR spectrum of the titration of **1a.2PF<sub>6</sub>** with NaNO<sub>3</sub> in D<sub>2</sub>O ([host] = 1.5 mM, 500 MHz, T = 318 K).

### S3. Perrhenate Binding Studies by Luminescence Spectroscopy

Luminescence titrations were performed using a HORIBA Fluorolog, and the data was processed using the FluorEssence software. For each titration, 2.0 mL of a 10  $\mu$ M solution of the receptor (**1a** or **1b**) was used initially in a 10 mM HEPES solution in water (pH = 7.4). NaReO<sub>4</sub> was dissolved in a 10  $\mu$ M solution of the receptor in 10 mM HEPES so that the concentration of the receptor remains constant throughout the titration. The NaReO<sub>4</sub> solution was added in known aliquots using a microliter syringe, and the sample was thoroughly shaken before the spectra was recorded. An excitation wavelength of  $\lambda_{\text{ex}} = 320$  nm was used for both receptors **1a** and **1b**.

### S4. References

1. B.-Y. Lee, S. R. Park, H. B. Jeon and K. S. Kim, *Tetrahedron Lett.*, 2006, **47**, 5105-5109.
2. M. R. J. Vallée, P. Majkut, I. Wilkening, C. Weise, G. Müller and C. P. R. Hackenberger, *Org. Lett.*, 2011, **13**, 5440-5443.
3. C. Nagamani, J. Guo and S. Thayumanavan, *J. Polym. Sci. A Polym. Chem.*, 2012, **50**, 1187-1196.
4. J. Wu, J. Li, U. Kolb and K. Mullen, *Chem. Commun.*, 2006, 48-50.
5. M. J. Hynes, *J. Chem. Soc. Dalton Trans.*, 1993, 311-312.
